# Supplementary material for: Cucurbit[6]uril-based multifunctional supramolecular assemblies: synthesis, removal of Ba(ii) and fluorescence sensing of Fe(iii)
Source: Royal Society of Chemistry journal article supplement (doi:10.1039/c8dt00182k), 2018-01-01
Supplement: c8dt00182k1.pdf [file c8dt00182k1.pdf]

## Electronic supplementary information (ESI)

### Cucurbit[6]uil-based multifunctional supramolecular assemblies: synthesis, removal of Ba(II) and fluorescence sensing of Fe(III)

Xiu-Du Zhang,<sup>a</sup> Yue Zhao,<sup>a</sup> Kai Chen,<sup>a,b</sup> Peng Wang,<sup>a</sup> Yan-Shang Kang,<sup>a</sup> Hua Wu<sup>\*a</sup> and Wei-Yin Sun<sup>\*a</sup>

<sup>a</sup> *Coordination Chemistry Institute, State Key Laboratory of Coordination Chemistry, School of Chemistry and Chemical Engineering, Nanjing National Laboratory of Microstructures, Collaborative Innovation Center of Advanced Microstructures, Nanjing University, Nanjing 210023, China*

<sup>b</sup> *School of Environmental Science and Engineering, Nanjing University of Information Science & Technology, Nanjing 210044, China*

\* Corresponding author.

*Email address:* wuhua@njau.edu.cn (H. Wu); sunwy@nju.edu.cn (W. Y. Sun).

**Table S1.** Selected bond lengths (Å) and angles (°) for assembly **2**<sup>a</sup>

|                                                            |           |                    |            |
|------------------------------------------------------------|-----------|--------------------|------------|
| Ba(1)-O(1)#2                                               | 2.882(7)  | Ba(1)-O(4)         | 2.707(6)   |
| Ba(1)-O(1W)                                                | 2.632(8)  |                    |            |
| O(4)#1-Ba(1)-O(4)                                          | 160.50(7) | O(1W)-Ba(1)-O(1)#2 | 85.36(15)  |
| O(1W)#1-Ba(1)-O(1W)                                        | 159.94(8) | O(4)-Ba(1)-O(1)#2  | 127.92(13) |
| O(1W)-Ba(1)-O(4)#1                                         | 101.6(2)  | O(1W)-Ba(1)-O(1)#3 | 111.10(15) |
| O(1W)-Ba(1)-O(4)                                           | 74.9(2)   | O(4)-Ba(1)-O(1)#3  | 69.93(11)  |
| O(1)#2-Ba(1)-O(1)#3                                        | 73.5(2)   |                    |            |
| Symmetry codes: #1 -x+1,-y,-z+1; #2 x,y,z+1; #3 -x+1,y,-z. |           |                    |            |

**Table S2.** Hydrogen bonding data of **1** and **2**.

| <b>1</b>                |                             |                               |                                       |                             |
|-------------------------|-----------------------------|-------------------------------|---------------------------------------|-----------------------------|
| <i>D</i> -H... <i>A</i> | <i>d</i> ( <i>D</i> -H) (Å) | <i>d</i> (H... <i>A</i> ) (Å) | <i>d</i> ( <i>D</i> ... <i>A</i> )(Å) | <i>D</i> -H... <i>A</i> (°) |
| O(6)-H(6)··O(6)         | 0.8500                      | 1.6100                        | 2.454(6)                              | 171                         |
| N(8)-H(8A)··O(2)        | 0.8800                      | 2.2600                        | 2.931(11)                             | 133                         |
| N(8)-H(8C)··O(1)        | 0.9100                      | 2.5000                        | 3.127(12)                             | 126                         |
| N(8)-H(8D)··O(4)        | 0.8900                      | 1.9300                        | 2.813(10)                             | 178                         |
| C(3)-H(3A)··O(7)        | 0.9900                      | 2.5000                        | 3.178(7)                              | 125                         |
| C(3)-H(3B)··O(7)        | 0.9900                      | 2.4400                        | 3.428(7)                              | 178                         |
| C(8)-H(8)··O(6)         | 1.0000                      | 2.5900                        | 3.447(7)                              | 144                         |
| C(9)-H(9A)··O(6)        | 0.9900                      | 2.5400                        | 3.448(7)                              | 152                         |
| C(11)-H(11)··O(5)       | 0.9500                      | 2.5000                        | 3.417(7)                              | 161                         |
| C(15)-H(15)··O(1)       | 0.9500                      | 2.8300                        | 3.512(7)                              | 129                         |

  

| <b>2</b>                |                             |                               |                                       |                             |
|-------------------------|-----------------------------|-------------------------------|---------------------------------------|-----------------------------|
| <i>D</i> -H... <i>A</i> | <i>d</i> ( <i>D</i> -H) (Å) | <i>d</i> (H... <i>A</i> ) (Å) | <i>d</i> ( <i>D</i> ... <i>A</i> )(Å) | <i>D</i> -H... <i>A</i> (°) |
| O(1W)-H(1W1)··O(2)      | 0.9300                      | 2.1000                        | 3.022(6)                              | 173                         |
| O(7)-H(7)··O(7)         | 1.229(12)                   | 1.229(12)                     | 2.457(5)                              | 175(11)                     |
| C(4)-H(4)··O(7)         | 1.0000                      | 2.6000                        | 3.512(7)                              | 152                         |
| C(6)-H(6B)··O(6)        | 0.9900                      | 2.4200                        | 3.406(7)                              | 174                         |
| C(13)-H(13)··O(8)       | 0.9500                      | 2.3400                        | 3.268(6)                              | 165                         |

**Table S3.** Adsorption capacity of some adsorbent material reported in literature for removal of Ba<sup>2+</sup>.

| adsorbent                                               | Maximum reported adsorption capacity (mg/g) | Reference  |
|---------------------------------------------------------|---------------------------------------------|------------|
| Hydrous cerium oxide                                    | 0.115                                       | 1          |
| Hydrous bismuth oxide                                   | 0.131                                       | 2          |
| Expanded perlite                                        | 2.486                                       | 3          |
| Dolomite powder                                         | 3.958                                       | 4          |
| Mxene                                                   | 9.3                                         | 5          |
| Mag-tit PVA-alginate beads                              | 19.45                                       | 6          |
| Solvent-extracted peat                                  | ~ 40                                        | 7          |
| Fe <sub>3</sub> O <sub>4</sub> @titanate nanocomposites | 118.4                                       | 8          |
| Fungus-titanate nanotube                                | 120                                         | 9          |
| Q[6]-based supramolecular assembly                      | 72.4                                        | This study |

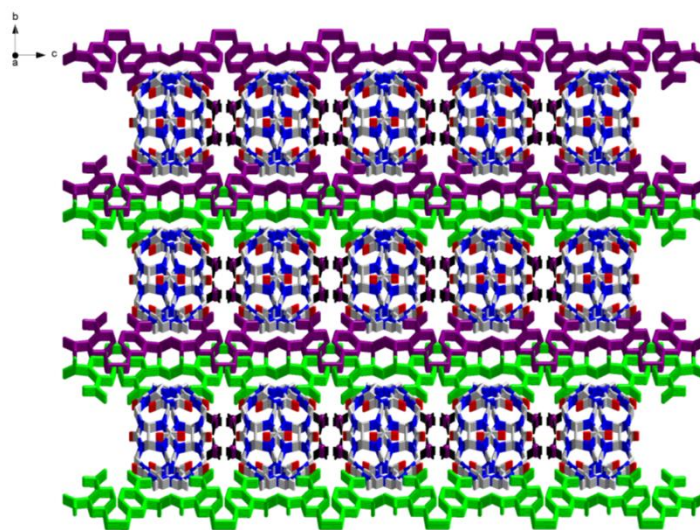

**Fig. S1.** Q[6] sandwiched by HDTNB<sup>-</sup> in the assembly **1**.

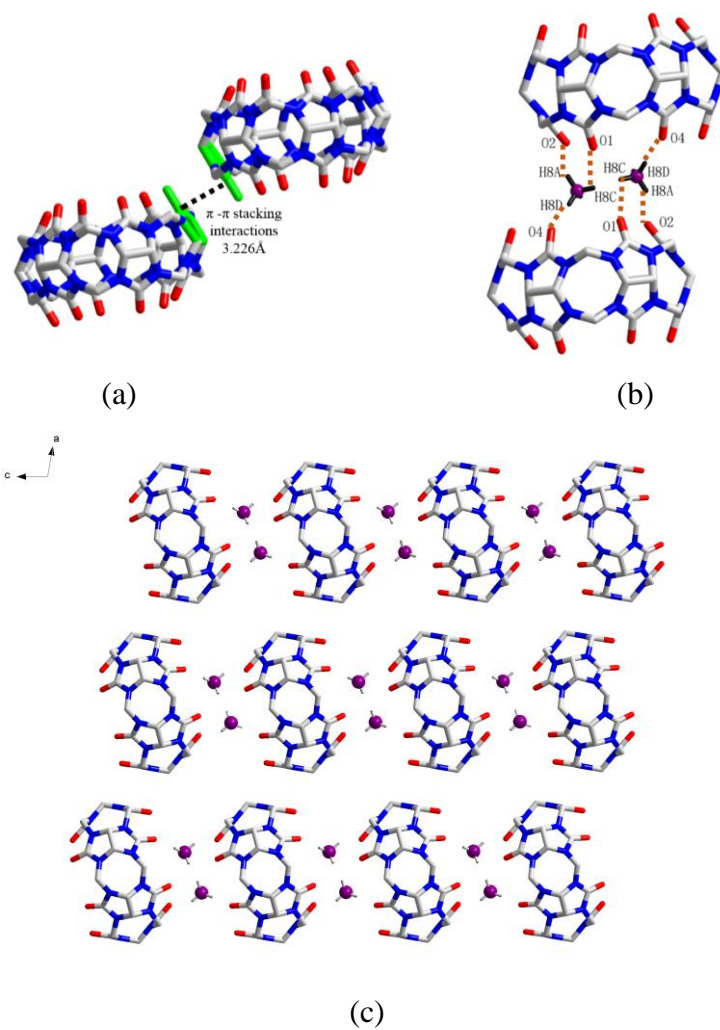

**Fig. S2.** (a) Interactions between Q[6] molecules. (b) Hydrogen-bonding interactions between  $\text{NH}_4^+$  and Q[6] molecules. (c) The 2D layer constructed by  $\text{NH}_4^+$  and Q[6]s.

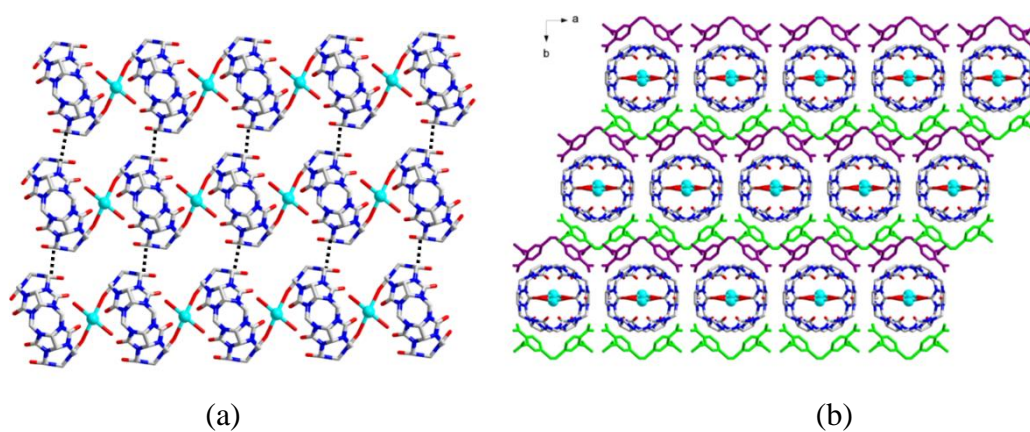

**Fig. S3.** (a) 2D network constructed by the 1D Q[6]-Ba<sup>2+</sup>-based chains through  $\pi$  - $\pi$  stacking interactions. (b) Structure of assembly **2** with alternating Q[6]-Ba<sup>2+</sup>-based layers and HDTNB<sup>-</sup> layers.

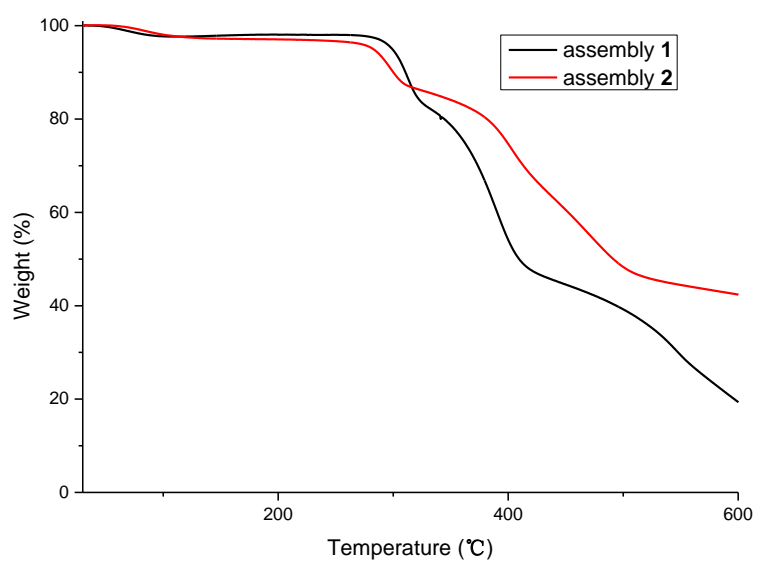

**Fig. S4.** TG curves of **1** and **2**.

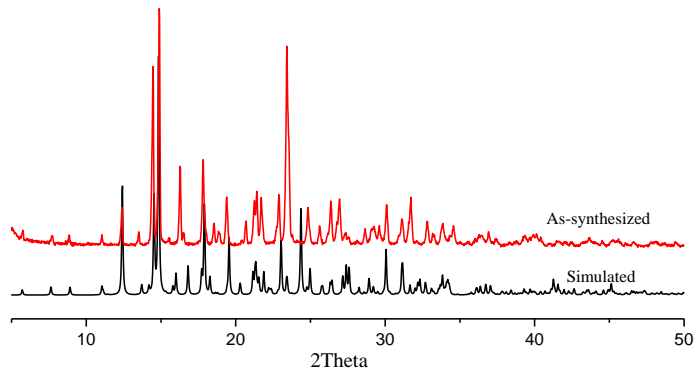

(a)

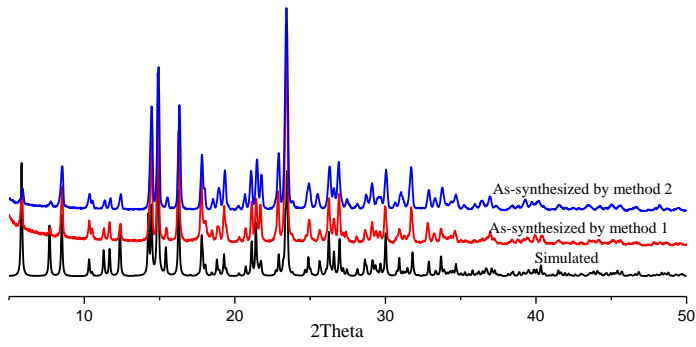

(b)

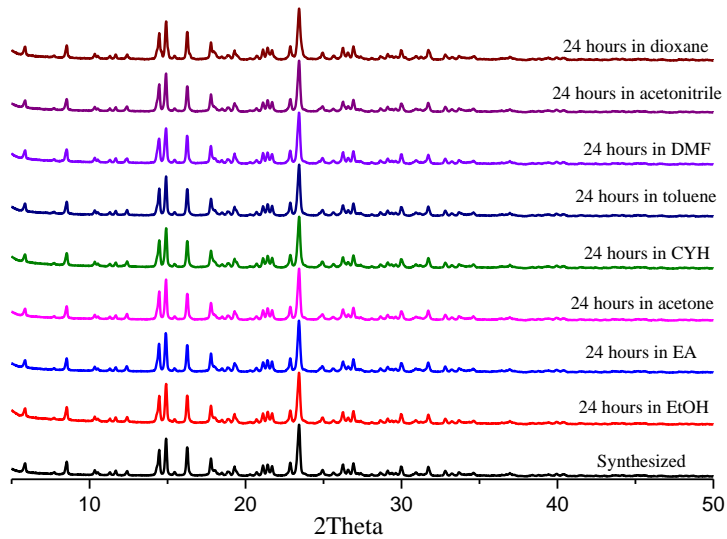

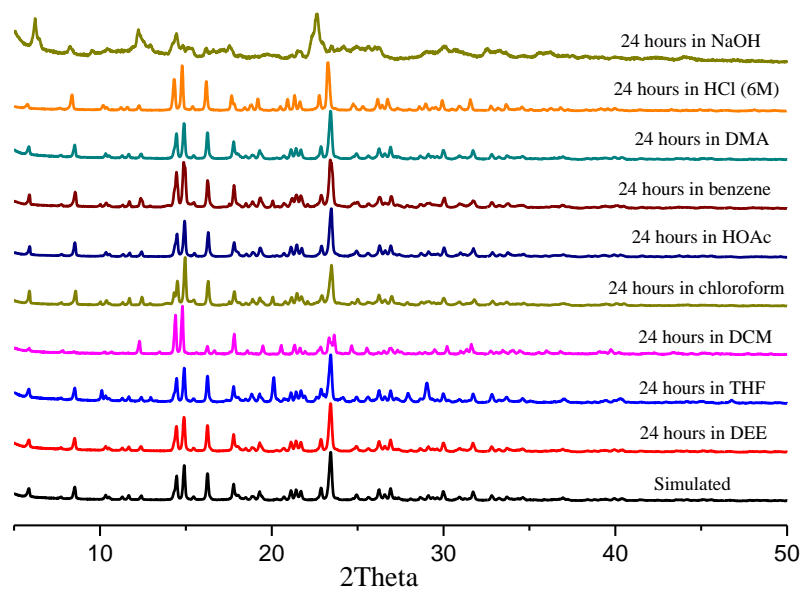

(c)

**Fig. S5.** PXRD patterns of **1** (a), **2** (b) and **1** dispersed in different solvent (c).

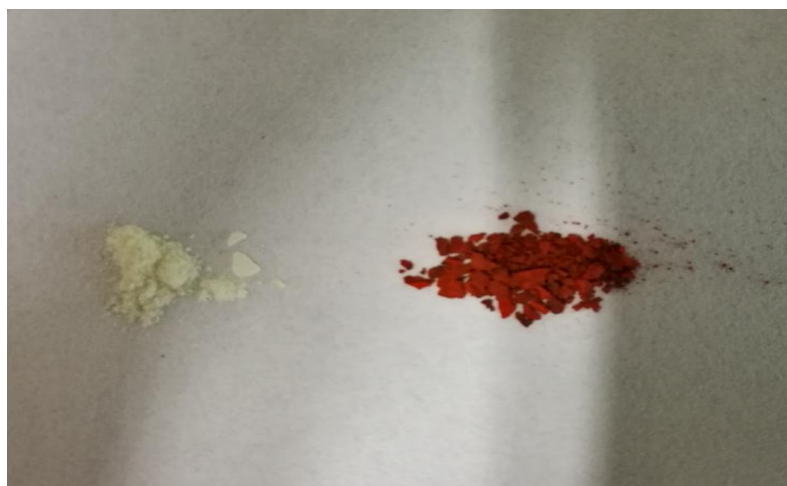

**Fig. S6.** Image of the solid samples of assembly **1** before (white) and after (red) dispersed in basic solution.



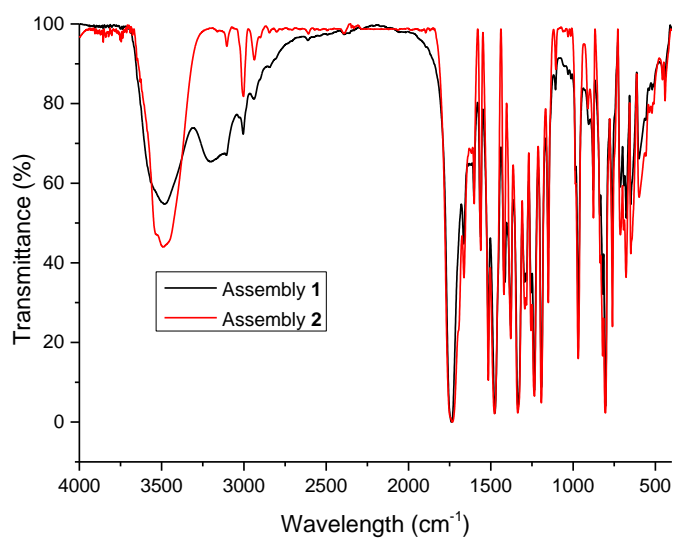

**Fig. S7.** IR spectra at room temperature of **1** and **2**.

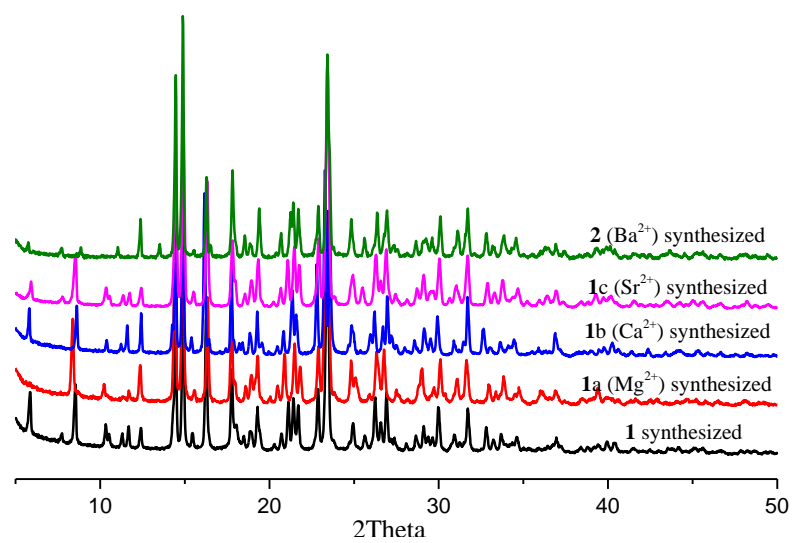

**Fig. S8.** PXRD patterns of **1a**, **1b**, **1c** and **2**.

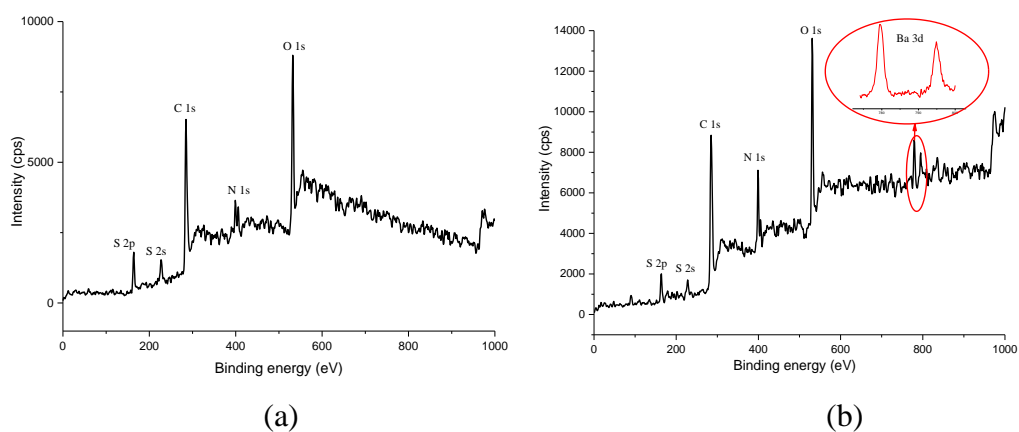

**Fig. S9.** XPS data of assembly **1** before (a) and after (b) immersed in mixed solution of alkaline-earth metal ions.

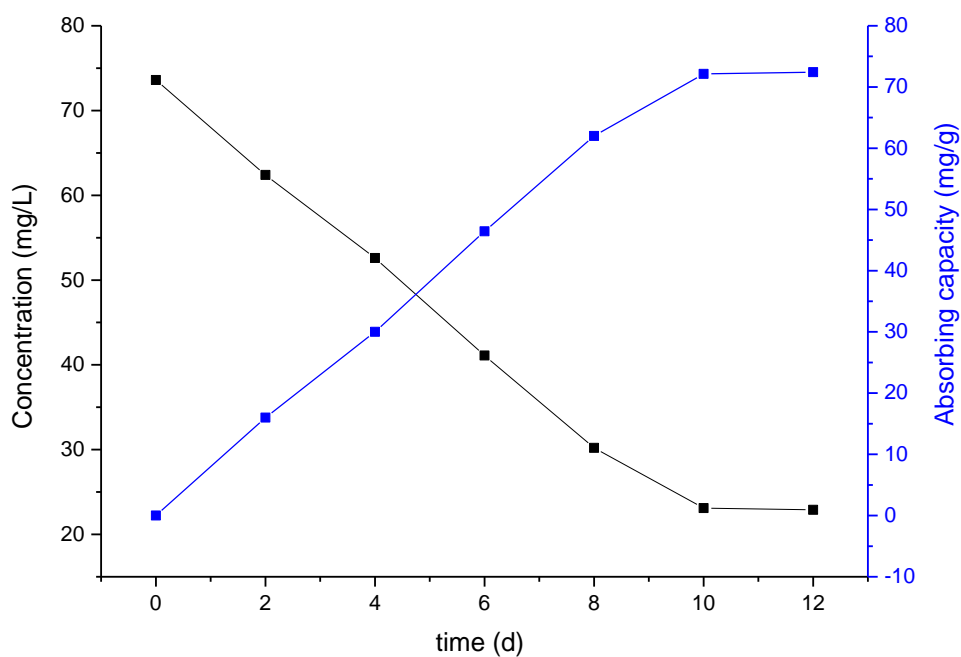

**Fig. S10.** ICP results of the concentration of Ba<sup>2+</sup> and the absorbing capacity against time (70 mg of the assembly **1** immersed in BaCl<sub>2</sub> concentration).

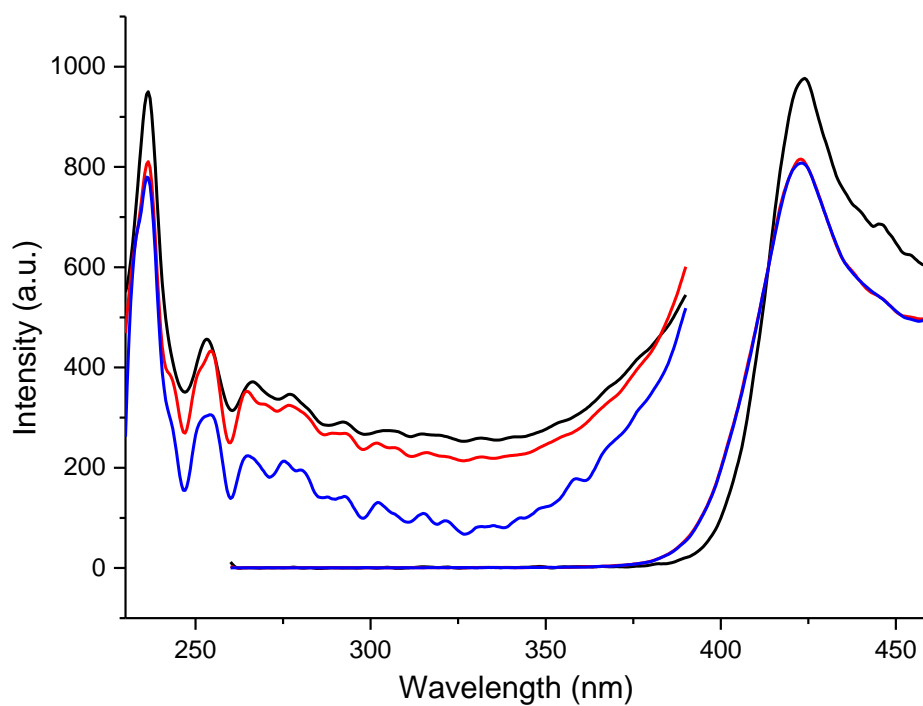

**Fig. S11.** The excitation and emission spectra of the aqueous suspension of H<sub>2</sub>DTNB, assembly **1** and assembly **2** (black: H<sub>2</sub>DTNB, Red: assembly **1**, blue: assembly **2**).

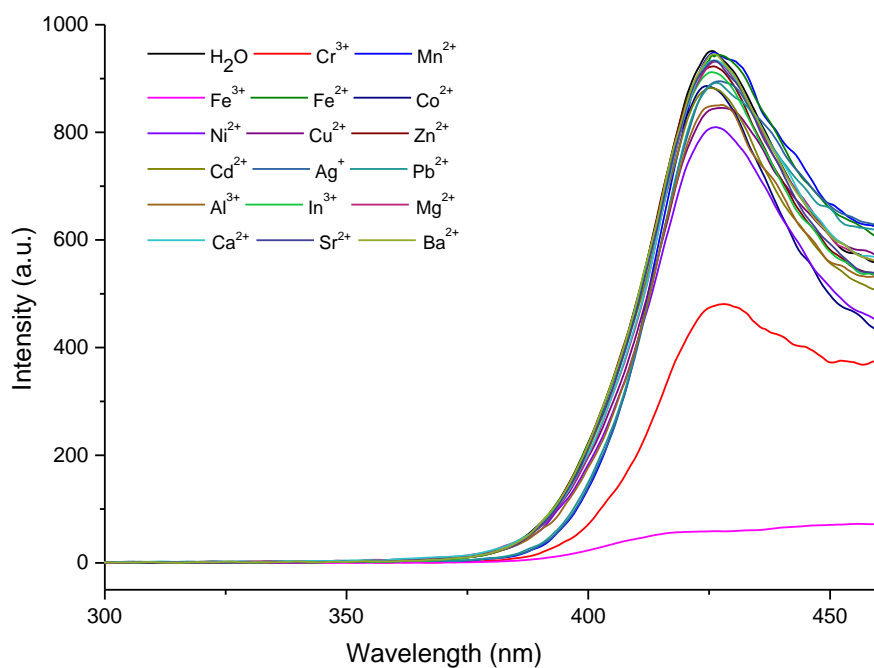

(a)

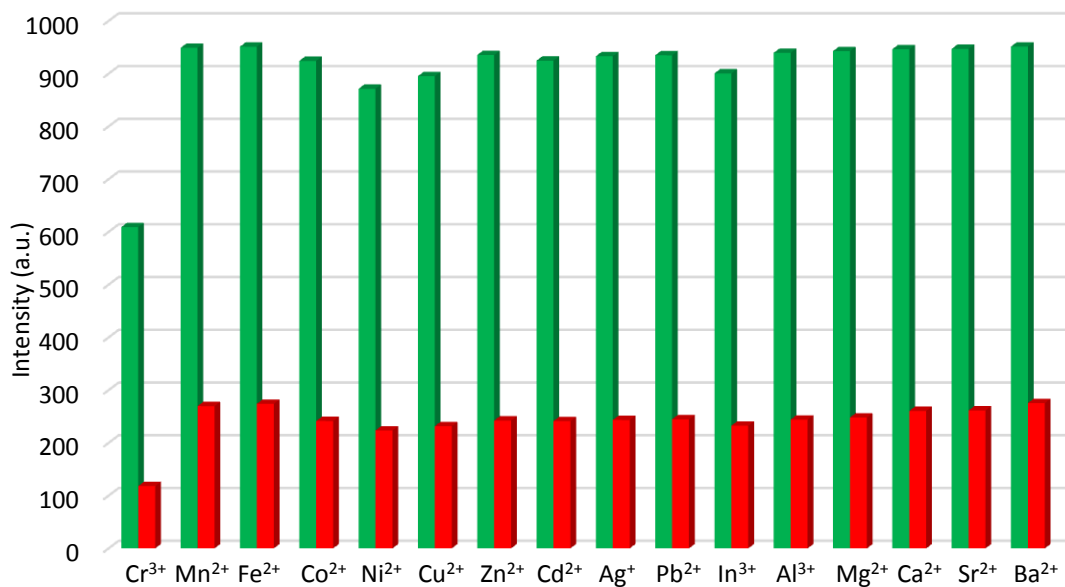

(b)

**Fig. S12.** (a) Fluorescence spectra of **1** in different metal ions, revealing selective detection of  $\text{Fe}^{3+}$  over other metal ions; (b) fluorescence intensity ratio histogram of the stock dispersion of **1** (3 mL, 2 mg/mL) in the case of addition the aqueous solution of other metal ions (100  $\mu\text{L}$ , 0.05 M) and then  $\text{Fe}^{3+}$  (100  $\mu\text{L}$ , 0.05 M) subsequently.

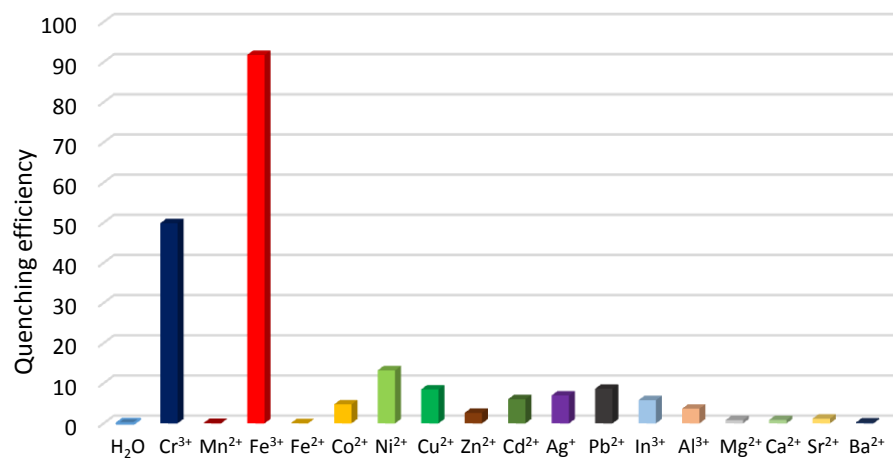

(a)

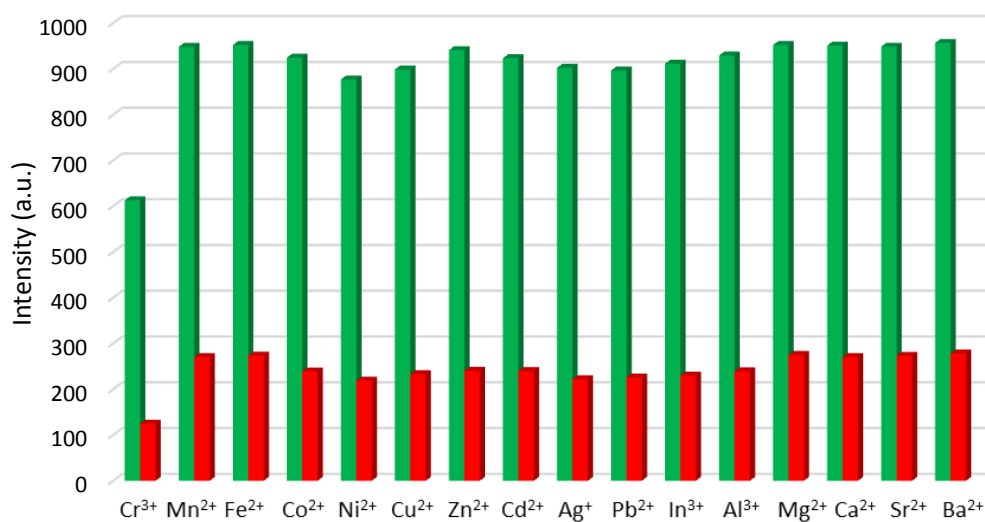

(b)

**Fig. S13.** (a) Quenching efficiency of **2** in different metal ions, revealing selective detection of Fe<sup>3+</sup> over other metal ions. (b) fluorescence intensity ratio histogram of the stock dispersion of **2** (3 mL, 2 mg/mL) in the case of addition the aqueous solution of other metal ions (100 μL, 0.05 M) and then Fe<sup>3+</sup> (100 μL, 0.05 M) subsequently.

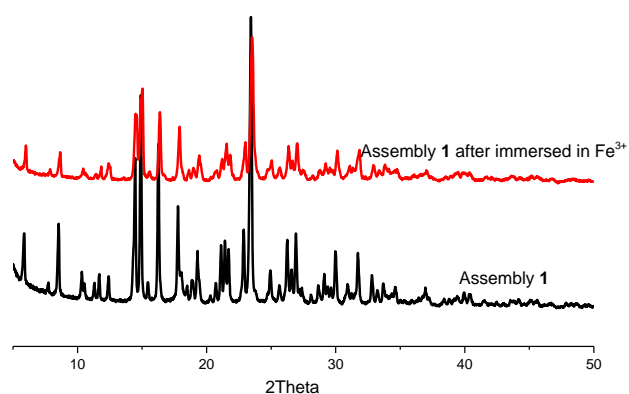

(a)

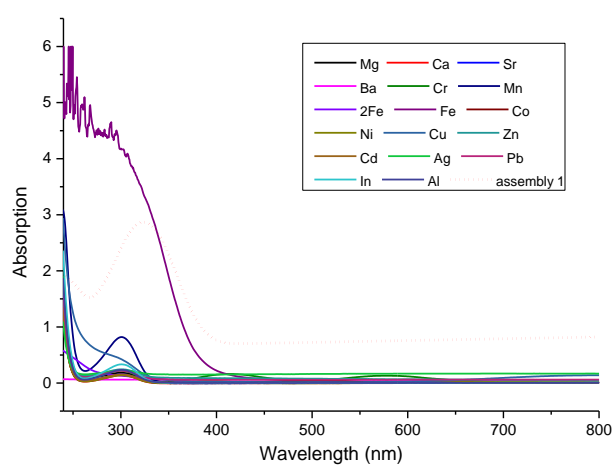

(b)

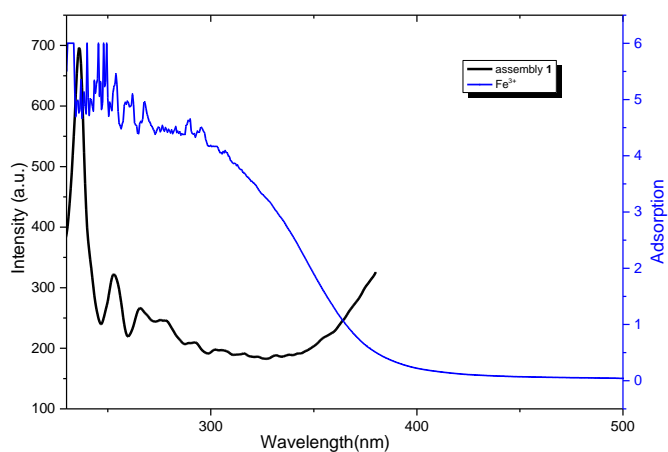

(c)

**Fig. S14.** (a) The PXR patterns of the assembly **1** before and after immersed in Fe<sup>3+</sup> solution; (b) absorption spectra of aqueous suspension containing different metal ions and assembly **1** (10 mM); (c) the absorption spectrum of Fe<sup>3+</sup> and excitation spectra of assembly **1** suspended stock solution in water.

## Reference

- [1] A. Nilchi, M. Yaftian, G. Aboulhasanlo, S. R. Garmarodi, *J. Radioanal. Nucl. Chem.*, **2009**, 279, 65-74.
- [2] S. P. Mishra, V. K. Singh, *Appl. Radiat. Iso.*, **1998**, 49, 43-48.
- [3] M. Torab-Mostaedi, A. Ghaemi, H. Ghassabzadeh, M. Ghannadi-Maragheh, *Can. J. Chem. Eng.*, **2011**, 89, 1247-1254.
- [4] A. Ghaemi, M. T. Mostaedi, M. G. Maragheh, *J. Hazard. Mater.*, **2011**, 190, 916-921.
- [5] A. K. Fard, G. Mckay, R. Chamoun, T. Rhadfi, H. Preud'Homme, M. A. Atieh, *Chem. Eng. J.*, **2017**, 317, 331-342.
- [6] Z. Majidnia, A. Idris, M. Majid, R. Zin, M. Ponraj, *Appl. Radiat. Iso.*, **2015**, 105, 105-113.
- [7] M. M. Minihan, E. McCann, J. J. Leahy, *Adsop. Sci. Techn.*, **2004**, 22, 783-893.
- [8] L. Zhou, M. Z. Xu, G. D. Wei, L. Li, M. V. Chubik, M. P. Chubik, A. A. Gromov, W. Han, *J. Mater. Sci.: Mater. Electron*, **2015**, 26, 2742-2747.
- [9] M. Z. Xu, G. D. Wei, N. Liu, L. Zhou, C. W. Fu, M. Chubik, A. Gromov, W. Han, *Nanoscale*, **2014**, 6, 722-725.
